# Supplementary material for: Endocrine control of canine mammary neoplasms: serum reproductive hormone levels and tissue expression of steroid hormone, prolactin and growth hormone receptors
Source: PubMed Central journal article supplement (PMC4570623; doi:10.1186/s12917-015-0546-y), 2015-09-15
Supplement: 12917_2015_546_MOESM1_ESM.pdf [file 12917_2015_546_MOESM1_ESM.pdf]

**Additional File 1:**

**1.1 Hormone levels, reproductive states, cycle stages, and relative gene expression (RGE) of receptors in normal tissues and/or mammary tumor(s) per dog**

N/A: not available

| dog | reproductive state/ cyclus | E2<br>pg/ml | P4<br>ng/ml | PRL<br>ng/ml | normal mammary tissue per dog (RGE) |        |        |        |       | mammary tumor(s) per dog (RGE)         |            |        |        |        |        |
|-----|----------------------------|-------------|-------------|--------------|-------------------------------------|--------|--------|--------|-------|----------------------------------------|------------|--------|--------|--------|--------|
|     |                            |             |             |              | PRLR                                | PGR    | ERα    | GHR    | CDH-1 | tumour typ                             | ERα (ESR1) | PGR    | PRLR   | GHR    | CDH-1  |
| 1   | intact (diestrus)          | N/A         | 3.69        | 4.48         | 55.18                               | 92.15  | N/A    | 9.29   | 20.25 | simple adenoma                         | N/A        | 223.13 | 115.53 | 13.29  | 130.43 |
| 2   | intact (anestrus)          | 11.40       | 0.13        | 3.17         | 148.55                              | 312.11 | 76.95  | 33.08  | 53.47 | complex adenoma                        | 30.84      | 72.45  | 90.51  | 9.54   | 53.01  |
| 3   | intact (diestrus)          | 11.53       | 10.03       | 8.94         | 79.51                               | 10.78  | 123.29 | 3.03   | 10.56 | complex adenoma                        | 13.77      | 7.31   | 26.16  | 8.22   | 40.48  |
| 4   | intact (anestrus)          | N/A         | 0.26        | 4.30         | 282.09                              | 221.89 | N/A    | 274.77 | 49.08 | simple adenoma                         | 46.58      | 173.17 | 114.53 | 8.56   | 72.17  |
| 5   | intact (anestrus)          | 9.46        | 1.13        | 3.20         | 99.99                               | 128.35 | 239.54 | 125.79 | 73.77 | complex adenoma                        | 73.90      | 118.35 | 135.57 | 18.24  | 77.64  |
| 6   | spayed                     | 2.35        | 0.22        | 3.41         | 147.38                              | 102.97 | 29.47  | 59.55  | 64.14 | simple adenoma                         | N/A        | 180.66 | 255.83 | 25.05  | 31.49  |
| 7   | spayed                     | 1.87        | 0.1         | 1.32         | 233.58                              | 56.68  | 139.59 | 99.69  | 46.13 | simple adenoma                         | N/A        | 55.45  | 78.23  | 18.10  | 77.74  |
| 8   | intact (anestrus)          | 5.43        | 0.11        | 8.05         | 218.99                              | 132.99 | 159.00 | 4.87   | 36.49 | complex adenoma                        | 46.94      | 66.67  | 114.75 | 123.67 | 42.12  |
| 9   | intact (anestrus)          | 16.32       | 0.07        | 2.02         | 155.48                              | 71.66  | 230.37 | 54.00  | 38.72 | complex adenoma                        | 297.08     | 88.35  | 108.75 | 56.16  | 32.59  |
| 10  | spayed                     | 0.52        | 0.05        | 2.89         | 100.99                              | 52.76  | 29.39  | 40.23  | 60.72 | simple adenoma                         | 439.53     | 159.43 | 223.74 | 63.70  | 97.05  |
| 11  | intact (diestrus)          | 13.23       | 51.1        | 3.34         | N/A                                 | N/A    | N/A    | N/A    | N/A   | complex adenoma                        | 296.24     | 38.42  | 130.94 | 80.08  | 56.70  |
| 12  | intact (anestrus)          | 4.27        | 0.67        | 2.04         | 67.53                               | 124.34 | 49.01  | 14.26  | 18.95 | mixed benign mammary tumor             | 109.35     | 16.78  | 51.47  | 51.71  | 37.29  |
| 13  | intact (diestrus)          | 10.79       | 70.94       | 3.41         | 461.70                              | 57.31  | 121.16 | 186.13 | 11.83 | anaplastic carcinoma                   | 31.67      | 30.71  | 8.14   | 5.38   | 18.85  |
| 14  | intact (anestrus)          | 5.91        | 0.71        | 2.78         | 140.19                              | 139.17 | 73.65  | 22.62  | 22.94 | complex carcinoma                      | 14.74      | 29.33  | 17.95  | 27.24  | 14.55  |
| 15  | intact (anestrus)          | 13.87       | 0.24        | 3.14         | 90.13                               | 46.93  | 47.46  | 13.01  | 9.95  | complex carcinoma                      | 6.69       | 42.30  | 24.36  | 10.40  | 40.12  |
| 16  | spayed                     | 1.66        | 0.32        | 4.39         | N/A                                 | N/A    | N/A    | N/A    | N/A   | simple carcinoma                       | 19.57      | 7.79   | 21.07  | 8.12   | 7.43   |
| 17  | spayed                     | 4.44        | 0.47        | 1.79         | 77.00                               | 213.01 | 2.92   | 80.74  | 39.56 | complex carcinoma                      | 3.71       | 8.90   | 22.41  | 11.31  | 45.92  |
| 18  | intact (anestrus)          | 3.26        | 1.34        | 2.81         | N/A                                 | N/A    | N/A    | N/A    | N/A   | simple carcinoma                       | 116.18     | 146.50 | 110.45 | 72.13  | 56.73  |
| 19  | intact (anestrus)          | 6.40        | 0.08        | 8.23         | 282.40                              | 159.01 | 189.22 | 28.69  | 56.43 | simple carcinoma                       | 146.58     | 19.12  | 184.20 | 27.68  | 67.45  |
| 20  | intact (anestrus)          | 8.66        | 0.44        | 2.77         | 197.63                              | 148.29 | 80.62  | 12.62  | 37.79 | complex carcinoma                      | 40.10      | 163.79 | 148.59 | 29.70  | 44.10  |
| 21  | spayed                     | 2.63        | 0.15        | 1.97         | N/A                                 | N/A    | N/A    | N/A    | N/A   | complex carcinoma                      | 99.91      | 126.03 | 87.04  | 14.72  | 27.28  |
| 22  | intact (diestrus)          | 11.70       | 91.4        | 4.63         | 45.24                               | 26.47  | 97.62  | 31.57  | 72.61 | ductal carcinoma                       | 29.17      | 62.16  | 77.73  | 34.09  | 28.99  |
| 23  | intact (diestrus)          | 9.02        | 5.54        | 4.22         | 93.39                               | 197.14 | 49.06  | 54.77  | 47.68 | simple carcinoma                       | 53.70      | 20.39  | 7.93   | 12.40  | 30.66  |
| 24  | intact (diestrus)          | 13.08       | 18.54       | 7.64         | 264.84                              | 33.94  | 15.93  | 2.86   | 49.29 | adeno-squamous carcinoma               | 11.94      | 3.81   | 42.46  | 11.09  | 35.74  |
| 25  | spayed                     | 2.45        | 0.87        | 3.95         | 155.03                              | 354.87 | 412.40 | 37.07  | 43.26 | simple carcinoma                       | 5.61       | 20.19  | 27.28  | 5.86   | 18.82  |
| 26  | intact (diestrus)          | 9.45        | 6.66        | 4.08         | 119.03                              | 179.96 | 105.01 | 92.02  | 26.27 | complex carcinoma                      | 80.21      | 25.85  | 70.53  | 6.10   | 17.94  |
| 27  | intact (anestrus)          | 8.05        | 0.39        | 3.07         | 187.36                              | 52.72  | 286.29 | 11.25  | 34.33 | anaplastic carcinoma                   | 2.86       | 1.19   | 8.54   | 5.97   | 1.00   |
| 28  | intact (diestrus)          | 11.11       | 7.1         | 2.50         | 66.86                               | 143.43 | 87.05  | 32.31  | 38.98 | complex carcinoma                      | 2.05       | 89.67  | 224.29 | 43.04  | 45.64  |
|     |                            |             |             |              |                                     |        |        |        |       | simple carcinoma                       | 114.60     | 158.41 | 72.68  | 19.28  | 36.07  |
|     |                            |             |             |              |                                     |        |        |        |       | anaplastic carcinoma                   | 3.30       | 1.76   | 2.29   | 10.60  | 32.61  |
|     |                            |             |             |              |                                     |        |        |        |       | simple carcinoma                       | 79.30      | 129.57 | 72.95  | 7.81   | 82.83  |
|     |                            |             |             |              |                                     |        |        |        |       | simple carcinoma                       | 65.46      | 181.29 | 79.54  | 34.28  | 101.04 |
|     |                            |             |             |              |                                     |        |        |        |       | simple carcinoma                       | 20.20      | 72.64  | 35.11  | 13.53  | 18.90  |
|     |                            |             |             |              |                                     |        |        |        |       | complex carcinoma                      | 31.80      | 51.33  | 50.76  | 43.62  | 29.28  |
|     |                            |             |             |              |                                     |        |        |        |       | complex carcinoma                      | 523.39     | 91.15  | 104.05 | 19.75  | 36.46  |
|     |                            |             |             |              |                                     |        |        |        |       | carcinoma and malignant myoepithelioma | 7.36       | 63.58  | 29.02  | 8.84   | 33.55  |
|     |                            |             |             |              |                                     |        |        |        |       | complex adenoma                        | 58.90      | 8.82   | 30.10  | 11.39  | 24.45  |
|     |                            |             |             |              |                                     |        |        |        |       | complex carcinoma                      | 15.97      | 31.33  | 16.22  | 15.85  | 6.56   |
|     |                            |             |             |              |                                     |        |        |        |       | complex carcinoma                      | 87.69      | 96.70  | 59.16  | 24.06  | 60.88  |
|     |                            |             |             |              |                                     |        |        |        |       | complex adenoma                        | 109.78     | 3.33   | 65.00  | 63.99  | 108.02 |
|     |                            |             |             |              |                                     |        |        |        |       | simple carcinoma                       | 73.82      | 147.30 | 61.95  | 39.11  | 148.07 |
|     |                            |             |             |              |                                     |        |        |        |       | ductal adenoma                         | 6.68       | 24.91  | 5.47   | 7.80   | 85.92  |
|     |                            |             |             |              |                                     |        |        |        |       | ductal carcinoma                       | 6.26       | 30.08  | 14.59  | 4.00   | 55.91  |
|     |                            |             |             |              |                                     |        |        |        |       | simple adenoma                         | 114.20     | 24.81  | 100.59 | 57.66  | 103.97 |
|     |                            |             |             |              |                                     |        |        |        |       | simple carcinoma                       | 96.58      | 57.61  | 47.66  | 12.58  | 79.87  |
|     |                            |             |             |              |                                     |        |        |        |       | complex carcinoma                      | 2.28       | 12.36  | 31.10  | 2.59   | 34.70  |
|     |                            |             |             |              |                                     |        |        |        |       | solid carcinoma                        | 4.43       | 10.21  | 4.35   | 4.61   | 31.87  |

|    |                   |       |       |      |        |        |        |       |       |                     |        |        |        |       |       |
|----|-------------------|-------|-------|------|--------|--------|--------|-------|-------|---------------------|--------|--------|--------|-------|-------|
| 29 | intact (diestrus) | 15.70 | 8.37  | 4.34 | 194.41 | 46.89  | 54.70  | 9.61  | 31.40 | simple carcinoma    | 9.87   | 7.05   | 32.80  | 8.86  | 15.29 |
|    |                   |       |       |      |        |        |        |       |       | complex carcinoma   | N/A    | 74.60  | 54.79  | 17.10 | 18.00 |
| 30 | intact (diestrus) | 13.87 | 24.53 | 4.06 | 123.14 | 21.35  | 69.03  | 27.40 | 24.57 | ductal carcinoma    | 77.63  | 92.55  | 75.51  | 52.70 | 84.12 |
| 31 | spayed            | 2.88  | 0.22  | 4.01 | 168.59 | 166.80 | 268.48 | 69.10 | 17.19 | complex adenoma     | 111.66 | 196.15 | 193.50 | 76.61 | 37.47 |
|    |                   |       |       |      |        |        |        |       |       | complex adenoma     | 28.75  | 43.46  | 33.46  | 17.39 | 10.09 |
|    |                   |       |       |      |        |        |        |       |       | benigne mixed tumor | 23.75  | 20.52  | 6.11   | 19.67 | 3.49  |
| 32 | intact (anestrus) | 4.10  | 0.5   | 6.22 | 99.92  | 36.35  | 80.65  | 7.96  | 18.19 | complex carcinoma   | 39.62  | 62.72  | 30.25  | 21.44 | 20.90 |
|    |                   |       |       |      |        |        |        |       |       | solid carcinoma     | NA     | 7.74   | N/A    | 3.70  | 64.86 |
|    |                   |       |       |      |        |        |        |       |       | solid carcinoma     | 9.65   | 117.36 | 1.60   | 2.33  | 46.02 |

## 1.2 Positive controls for luteal PRL and ER $\beta$ (ESR2) expression as determined by conventional RT-PCR

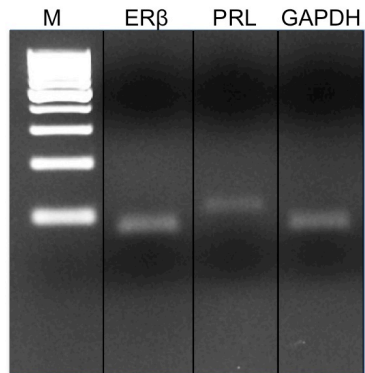

GAPDH = reference gene

M = molecular weight marker
